# Supplementary material for: Switching on near-infrared light in lanthanide-doped CsPbCl 3 perovskite nanocrystals
Source: Royal Society of Chemistry journal article supplement (doi:10.1039/d1nr00385b), 2021-01-01
Supplement: d1nr00385b1.pdf [file d1nr00385b1.pdf]

**Supporting Information for**

**Switching on near-infrared light in  
lanthanide-doped CsPbCl<sub>3</sub> perovskite  
nanocrystals**

Min Zeng,<sup>a,b,c</sup> Federico Locardi,<sup>c</sup> Dimitrije Mara,<sup>d</sup> Zeger Hens,<sup>c</sup> Rik Van Deun<sup>b</sup>  
and Flavia Artizzu<sup>\*b</sup>

<sup>a</sup> Hubei Key Laboratory of Ferro & Piezoelectric Materials and Devices, Faculty of  
Physics & Electronic Sciences, Hubei University, Wuhan 430062, China

<sup>b</sup> L<sup>3</sup>-Luminescent Lanthanide Lab, Ghent University, Gent 9000, Belgium

<sup>c</sup> Physics and Chemistry of Nanostructures (PCN), Ghent University, Gent 9000,  
Belgium

<sup>d</sup> Molecular Imaging and Photonics, Department of Chemistry, KU Leuven,  
Celestijnenlaan 200d, 3001 Leuven, Belgium

\*Corresponding Author: [Flavia.Artizzu@UGent.be](mailto:Flavia.Artizzu@UGent.be)

## Table of contents

1. Table S1 Nominal and actual doping concentrations in CsPbCl<sub>3</sub> NCs.
2. Fig. S1 Spectral overlaps between Mn<sup>2+</sup> emission and Ln<sup>3+</sup> absorption.
3. Fig. S2 Absorption spectra, PL spectra and PL decay curves of the CsPbCl<sub>3</sub> NCs without and with different doping concentrations of Mn<sup>2+</sup> ions.
4. Fig. S3 TEM images of undoped and doped CsPbCl<sub>3</sub> NCs.
5. Fig. S4 PL decay curves of undoped and doped CsPbCl<sub>3</sub> NCs collected by monitoring the band-edge emission.
6. Fig. S5 PL spectra and decay curves of Mn<sup>2+</sup>–Er<sup>3+</sup> codoped CsPbCl<sub>3</sub> NCs with different doping concentrations.
7. Table S2 Decay parameters of the Mn<sup>2+</sup> emission at 600 nm in Mn<sup>2+</sup>-doped and codoped CsPbCl<sub>3</sub> NCs.
8. Fig. S6 Schematic energy-level diagram illustrating the possible energy-transfer mechanism.

**Table S1** Nominal and actual doping concentrations in CsPbCl<sub>3</sub> NCs, determined by XRF measurements. The amount of Pb(CH<sub>3</sub>CO<sub>2</sub>)<sub>2</sub> is fixed at 0.2 mmol.

| Nominal ratio                             | Starting amounts <sup>a</sup>                               |                                                             | Actual amounts |        |        |
|-------------------------------------------|-------------------------------------------------------------|-------------------------------------------------------------|----------------|--------|--------|
|                                           | Mn(CH <sub>3</sub> CO <sub>2</sub> ) <sub>3</sub><br>(mmol) | Ln(CH <sub>3</sub> CO <sub>2</sub> ) <sub>3</sub><br>(mmol) | Pb (%)         | Mn (%) | Ln (%) |
| Mn/Pb = 2.5%                              | 0.005                                                       | —                                                           | 99.42%         | 0.58%  | —      |
| Mn/Pb = 5.0%                              | 0.01                                                        | —                                                           | 98.59%         | 1.41%  | —      |
| Mn/Pb = 10%                               | 0.02                                                        | —                                                           | 97.33%         | 2.67%  | —      |
| Mn/Pb = 15%                               | 0.03                                                        | —                                                           | 96.57%         | 3.43%  | —      |
| Er/Pb = 10%                               | —                                                           | 0.02                                                        | 99.45%         | —      | 0.55%  |
| Ho/Pb = 10%                               | —                                                           | 0.02                                                        | 99.60%         | —      | 0.40%  |
| Nd/Pb = 10%                               | —                                                           | 0.02                                                        | 97.66%         | —      | 2.34%  |
| Mn <sup>2+</sup> -Er <sup>3+</sup> (2: 1) | 0.01                                                        | 0.005                                                       | 98.64%         | 1.27%  | 0.09%  |
| Mn <sup>2+</sup> -Er <sup>3+</sup> (1: 1) | 0.01                                                        | 0.01                                                        | 98.69%         | 1.16%  | 0.15%  |
| Mn <sup>2+</sup> -Er <sup>3+</sup> (1: 2) | 0.01                                                        | 0.02                                                        | 98.73%         | 1.03%  | 0.24%  |
| Mn <sup>2+</sup> -Er <sup>3+</sup> (1: 4) | 0.01                                                        | 0.04                                                        | 98.91%         | 0.71%  | 0.38%  |
| Mn <sup>2+</sup> -Ho <sup>3+</sup> (1: 2) | 0.01                                                        | 0.02                                                        | 98.97%         | 0.86%  | 0.17%  |
| Mn <sup>2+</sup> -Nd <sup>3+</sup> (1: 2) | 0.01                                                        | 0.02                                                        | 93.88%         | 1.19%  | 4.93%  |

<sup>a</sup>The starting amount of Ho might be overestimated considering the x-hydrate [Ho(CH<sub>3</sub>CO<sub>2</sub>)<sub>3</sub>·xH<sub>2</sub>O] formula of the precursor.

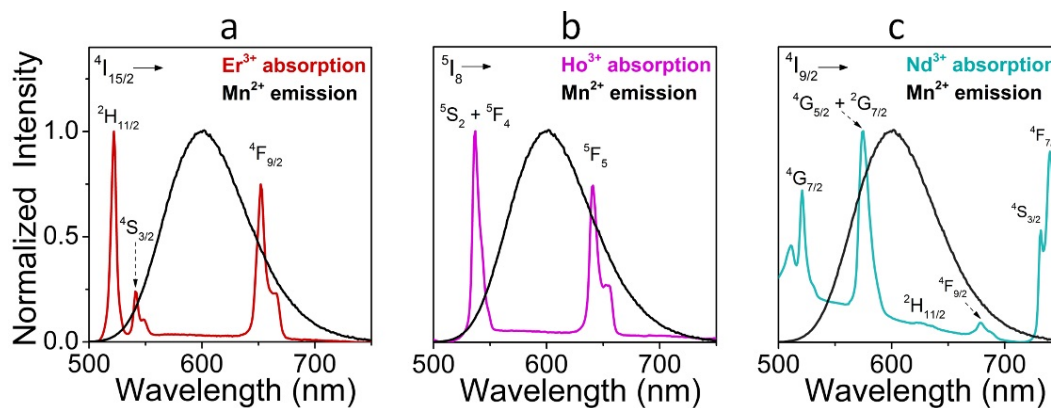

**Fig. S1** Spectral overlaps between (a)  $\text{Mn}^{2+}$  emission and  $\text{Er}^{3+}$  absorption, (b)  $\text{Mn}^{2+}$  emission and  $\text{Ho}^{3+}$  absorption, and (c)  $\text{Mn}^{2+}$  emission and  $\text{Nd}^{3+}$  absorption. The  $\text{Ln}^{3+}$  ions ( $\text{Er}^{3+}$ ,  $\text{Ho}^{3+}$  and  $\text{Nd}^{3+}$ ) absorption spectra were obtained from 0.05 M lanthanide chloride salts aqueous solution.

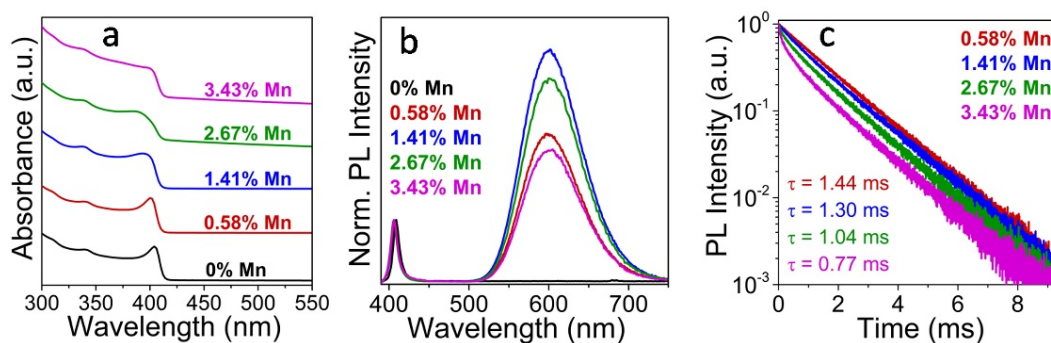

**Fig. S2** Optical properties of CsPbCl<sub>3</sub> NCs without and with different doping concentrations of Mn<sup>2+</sup> ions. (a) Absorption spectra (optical density at first exciton is below 0.3), (b) PL spectra normalized at the band-edge emission, (c) decay curves monitored by the Mn<sup>2+</sup> <sup>4</sup>T<sub>1</sub> → <sup>6</sup>A<sub>1</sub> transition at 600 nm. The broadening of the band-edge absorption band with increasing Mn<sup>2+</sup> doping can be attributed to the increased inhomogeneous morphologies of the NCs, as shown in Fig. S3a and b. The decrease in PL intensity and the shortening of the decay dynamics of Mn<sup>2+</sup> emission in Mn<sup>2+</sup>-doped NCs with increasing Mn<sup>2+</sup> content (>1.4%) can be attributed to the Mn<sup>2+</sup>–Mn<sup>2+</sup> coupling interactions and formed defects/traps near the Mn<sup>2+</sup> ions.<sup>1</sup>

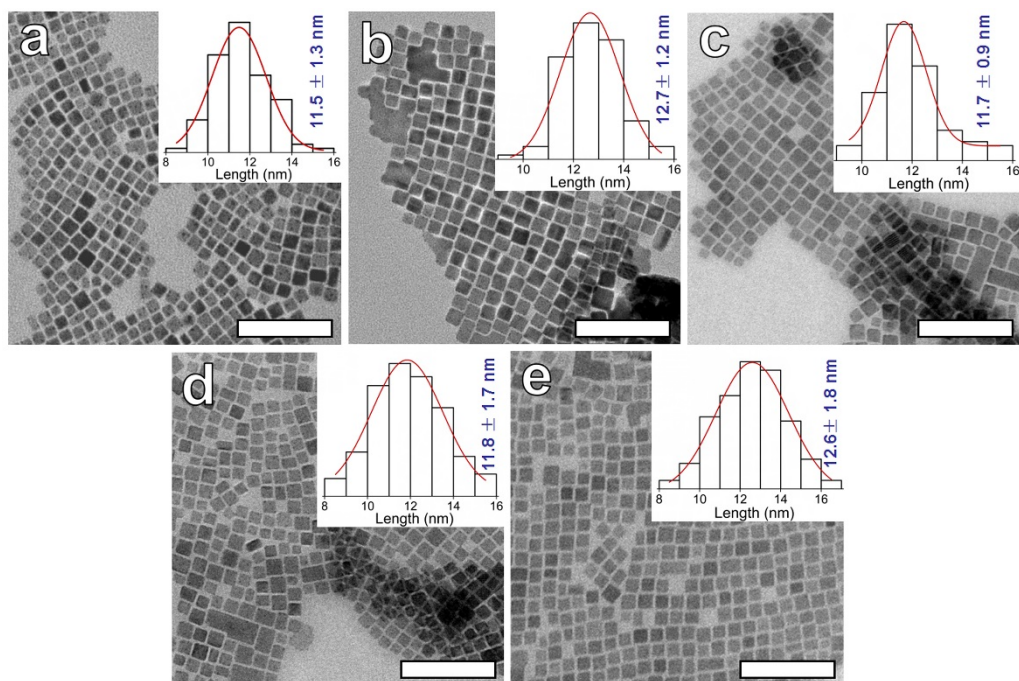

**Fig. S3** TEM images of (a) undoped CsPbCl<sub>3</sub> NCs, (b) 1.41% Mn<sup>2+</sup>, (c) 1.03% Mn<sup>2+</sup>–0.24% Er<sup>3+</sup>, (d) 0.86% Mn<sup>2+</sup>–0.17% Ho<sup>3+</sup>, and (e) 1.19% Mn<sup>2+</sup>–4.93% Nd<sup>3+</sup> codoped CsPbCl<sub>3</sub> NCs together with the corresponding size distribution histograms. The scale bars are 100 nm.

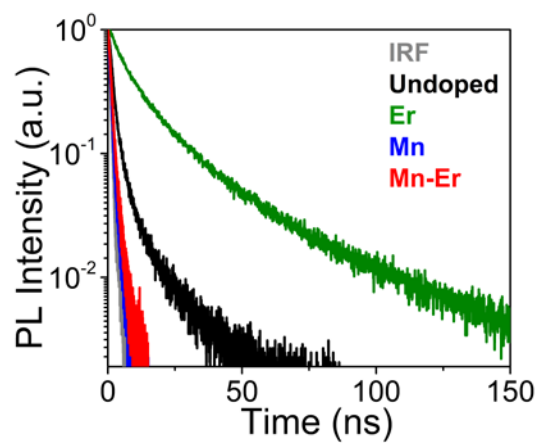

**Fig. S4** PL decay curves of undoped and doped CsPbCl<sub>3</sub> NCs collected by monitoring the band-edge emission of the CsPbCl<sub>3</sub> host ( $\lambda_{\text{ex}} = 350$  nm). The instrumental response function (IRF) was determined to be approximately 0.8 ns by measuring the scattering of a Ludox solution. The BE emission lifetimes of undoped and Er<sup>3+</sup>-doped NCs are ~2.4 and 12.3 ns, respectively.

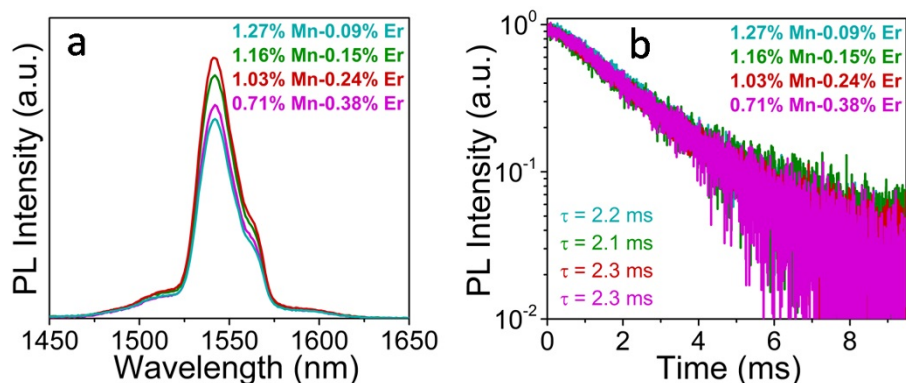

**Fig. S5** (a) PL spectra of Mn<sup>2+</sup>–Er<sup>3+</sup> codoped CsPbCl<sub>3</sub> NCs with different doping concentrations under excitation at 365 nm. It is worth noting that, while maintaining the same nominal amount, the actual Mn<sup>2+</sup> concentration decreases as the Er<sup>3+</sup> loading is increased, likely indicating a competition of the two ions for the doping sites. (b) Corresponding PL decay curves collected by monitoring Er<sup>3+</sup> emission at 1542 nm.



**Table S2** Decay parameters of the Mn<sup>2+</sup> emission at 600 nm in Mn<sup>2+</sup>-doped, Mn<sup>2+</sup>-Er<sup>3+</sup>, Mn<sup>2+</sup>-Ho<sup>3+</sup> and Mn<sup>2+</sup>-Nd<sup>3+</sup> codoped CsPbCl<sub>3</sub> NCs. Average lifetimes:  $\tau = \sum A_i \tau_i / \sum A_i$ , where  $A_i$  and  $\tau_i$  represent the amplitude and the lifetime component of the multiple exponential functions by fitting the PL decay curve, respectively; energy transfer efficiency:  $\eta = 1 - \tau_{\text{Mn-Ln}} / \tau_{\text{Mn}}$ , where  $\tau_{\text{Mn-Ln}}$  and  $\tau_{\text{Mn}}$  are the lifetimes of Mn<sup>2+</sup> emission in the presence and absence of Ln<sup>3+</sup>, respectively.

| Sample                             | $\tau_1$ (ms) (A <sub>1</sub> ) | $\tau_2$ (ms) (A <sub>2</sub> ) | $\tau$ (ms) | $\eta$ |
|------------------------------------|---------------------------------|---------------------------------|-------------|--------|
| Mn <sup>2+</sup>                   |                                 | 1.30                            | 1.30        |        |
| Mn <sup>2+</sup> -Er <sup>3+</sup> | 0.27 (0.43)                     | 1.19 (0.57)                     | 0.79        | 39.2%  |
| Mn <sup>2+</sup> -Ho <sup>3+</sup> | 0.23 (0.37)                     | 1.21 (0.63)                     | 0.85        | 34.6%  |
| Mn <sup>2+</sup> -Nd <sup>3+</sup> | 0.12 (0.65)                     | 0.88 (0.35)                     | 0.39        | 70.0%  |

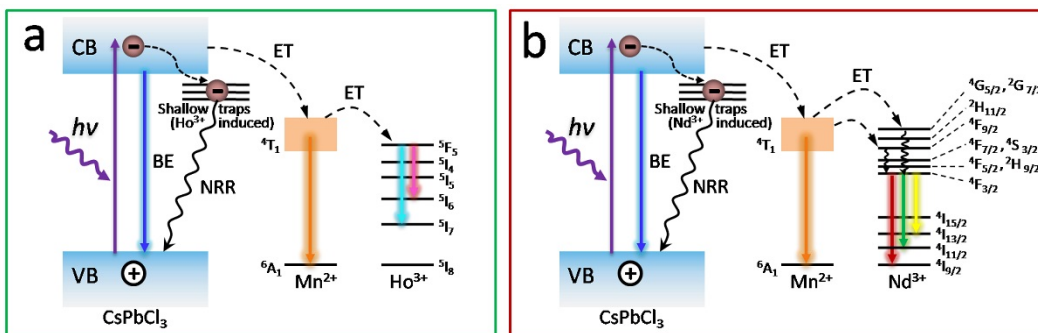

**Fig. S6** Schematic energy-level diagram illustrating the possible energy-transfer mechanism in (a) Mn<sup>2+</sup>-Ho<sup>3+</sup> codoped CsPbCl<sub>3</sub> NCs and (b) Mn<sup>2+</sup>-Nd<sup>3+</sup> codoped CsPbCl<sub>3</sub> NCs. The vertical blue arrow represents the host band-edge (BE) emission, the vertical orange arrow corresponds to the Mn<sup>2+</sup> d-d transition, the vertical colorful arrow to the f-f transition of Ho<sup>3+</sup> and Nd<sup>3+</sup>, and the zigzag black arrow depicts the nonradiative recombination (NRR). Energy transfer (ET) processes are indicated by dashed black arrows.

Fig. S6 depicts the proposed energy-transfer mechanism in Mn<sup>2+</sup>-Ho<sup>3+</sup> and Mn<sup>2+</sup>-Nd<sup>3+</sup> codoped CsPbCl<sub>3</sub> NCs. The energy-transfer processes from the CsPbCl<sub>3</sub> host to the Mn<sup>2+</sup> ions in both cases are similar. For Mn<sup>2+</sup>-Ho<sup>3+</sup> codoped CsPbCl<sub>3</sub> NCs, energy is first transferred from Mn<sup>2+</sup> to the <sup>5</sup>F<sub>5</sub> excited state of Ho<sup>3+</sup> and then radiative decay to the <sup>5</sup>I<sub>6</sub> and <sup>5</sup>I<sub>7</sub> energy levels occurs giving rise to emission at wavelengths of 986 nm and 1484 nm. For Mn<sup>2+</sup>-Nd<sup>3+</sup> codoped CsPbCl<sub>3</sub> NCs, the obtained energy in the <sup>4</sup>T<sub>1</sub> d-state of Mn<sup>2+</sup> is transferred to the lower <sup>4</sup>G<sub>5/2</sub> and <sup>4</sup>F<sub>9/2</sub> receiving energy levels of Nd<sup>3+</sup> and then experiences nonradiative relaxation to the <sup>4</sup>F<sub>3/2</sub> emitting level, followed by the radiative emissions at 888 nm, 1064 nm and 1340 nm.

## REFERENCES

- 1 K. Xing, X. Yuan, Y. Wang, J. Li, Y. Wang, Y. Fan, L. Yuan, K. Li, Z. Wu, H. Li and J. Zhao, *J. Phys. Chem. Lett.*, 2019, **10**, 4177-4184.
